# Supplementary material for: Bioaerosol Sensor for In Situ Measurement: Real-Time Measurement of Bioaerosol Particles in a Real Environment and Demonstration of the Effectiveness of Air Purifiers to Reduce Bioaerosol Particle Concentrations at Hot Spots
Source: MDPI journal article supplement (doi:10.3390/atmos14111656), 2023-11-05
Supplement: s1 [file s1]

# Supplementary Materials:

U Yanagi <sup>1,\*</sup>, Nobuhiko Fukushima <sup>2,\*</sup>, Hideyasu Nagai <sup>2</sup>, Haoyi Ye <sup>1</sup> and Minoru Kano <sup>2</sup>

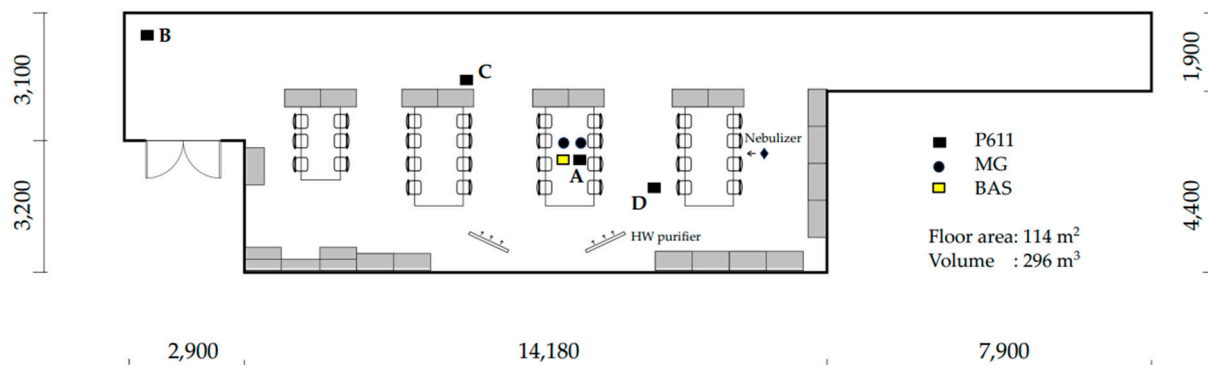

**Figure S1.** Plane of the room to be measured and measurement points.

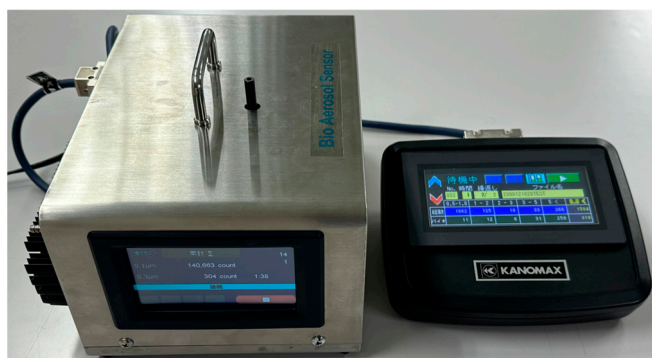

**Figure S2.** Appearance of the bioaerosol sensor (BAS).
